# Supplementary material for: Integrated analysis of transcriptome and proteome reveal that PDCoV infection induces autophagy-dependent ferroptosis to facilitate viral replication
Source: Research Square preprint supplement (doi:10.21203/rs.3.rs-7417457/v1), 2025-09-15
Supplement: Supplementary file 1 [file 93fa9f916c70356ae100af21.docx]

**Supplementary Figures**

**
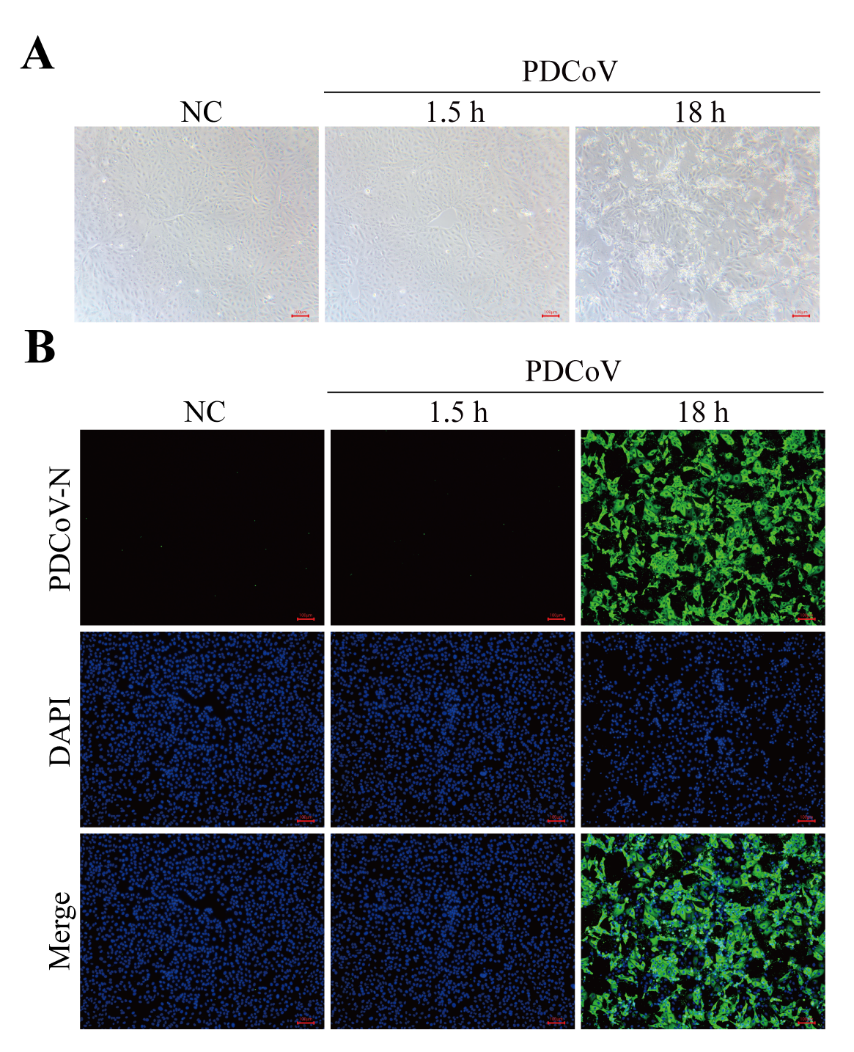
**

**Fig. S1 Characterization of PDCoV infection in LLC-PK1 cells.**

(A) CPE of PDCoV-infected LLC-PK cells at 1.5 h post-infection and 18 h post-infection. MOI=2. Scale Bar, 100 μm. (B) IFA was conducted to assess the virus infection status. Cells were fixed, and virus-infected cells were visualized through immunofluorescence (IF) staining of the PDCoV N protein (green). Cell nuclei were stained with DAPI (blue). Scale bar, 100 μm.

**
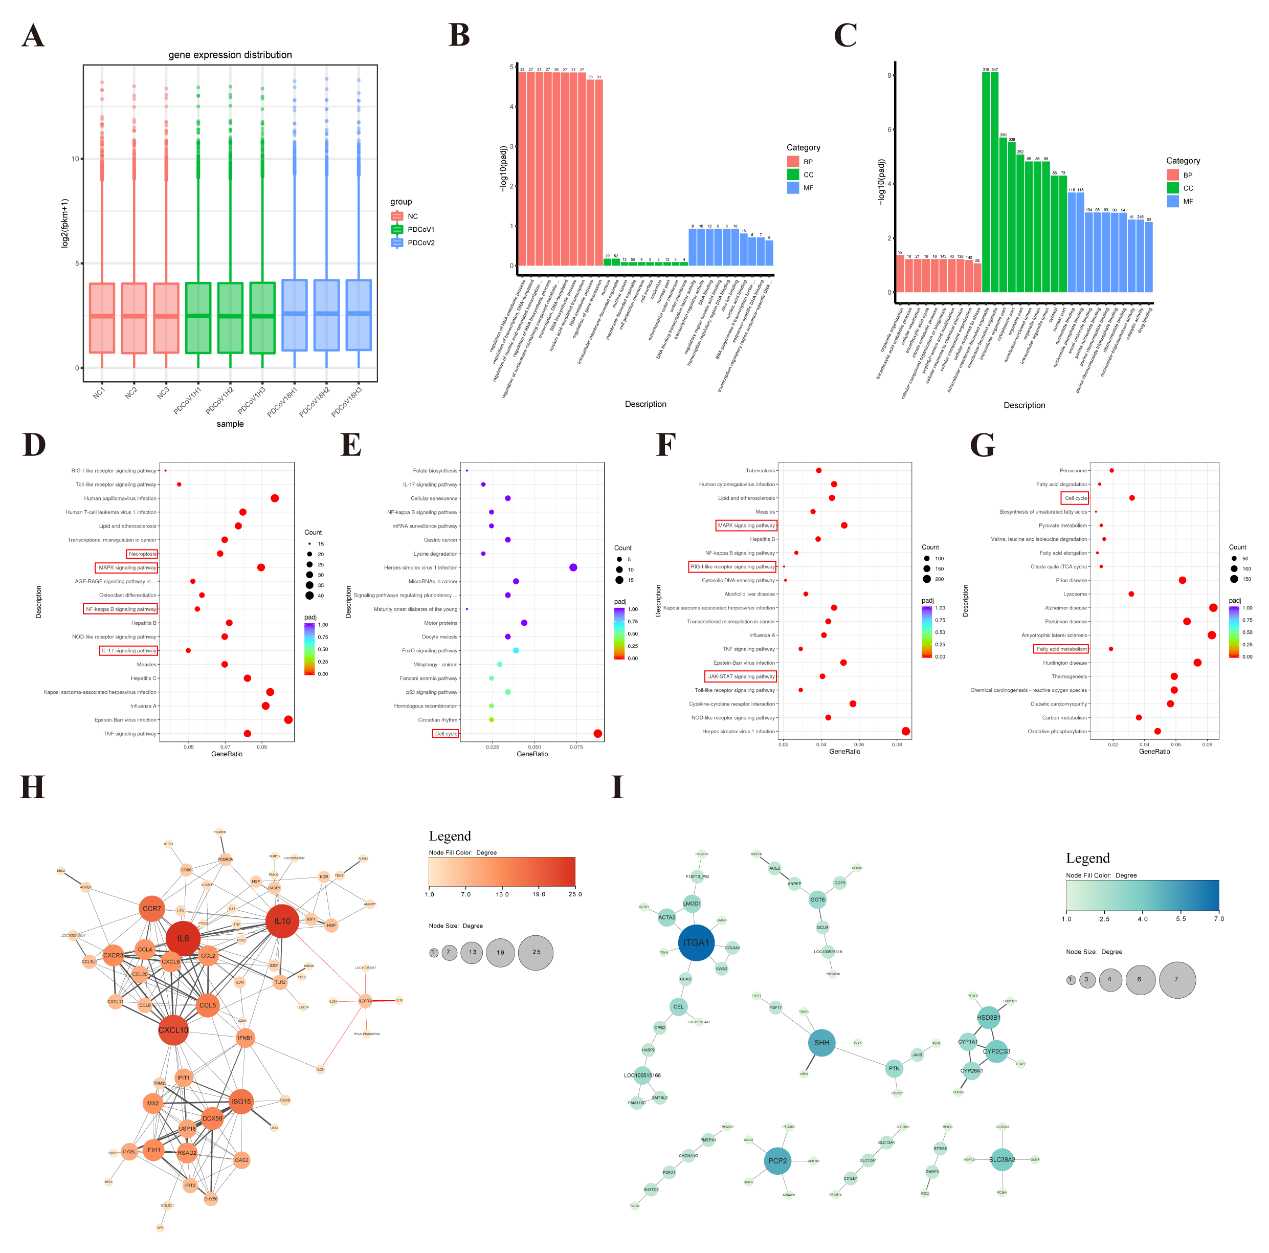
**

**Fig. S2 Quality evaluation and transcriptomic enrichment analysis of the DEGs**

(A) The boxplot distribution of gene expression level. (B) GO annotations of the all DEGs at 1.5 h post-infection. The x-axis represents the GO function and the y-axis was the -log 10 (padj) value. (C) GO annotations of the all DEGs group at 18 h post-infection. The x-axis represent she GO function and the y-axis was the -log 10 (padj) value. (D, E) Top 20 of enriched KEGG for up-regulated and down-regulated DEGs at 1.5 h post-infection. (F, G) Top 20 of enriched KEGG for up-regulated and down-regulated DEGs at 18 h post-infection. (H, I) PPI of up-regulated and down-regulated DEGs at 18 h post-infection. The size of the circles and the depth of the colors indicated the numbers of interacted proteins and the fold change.


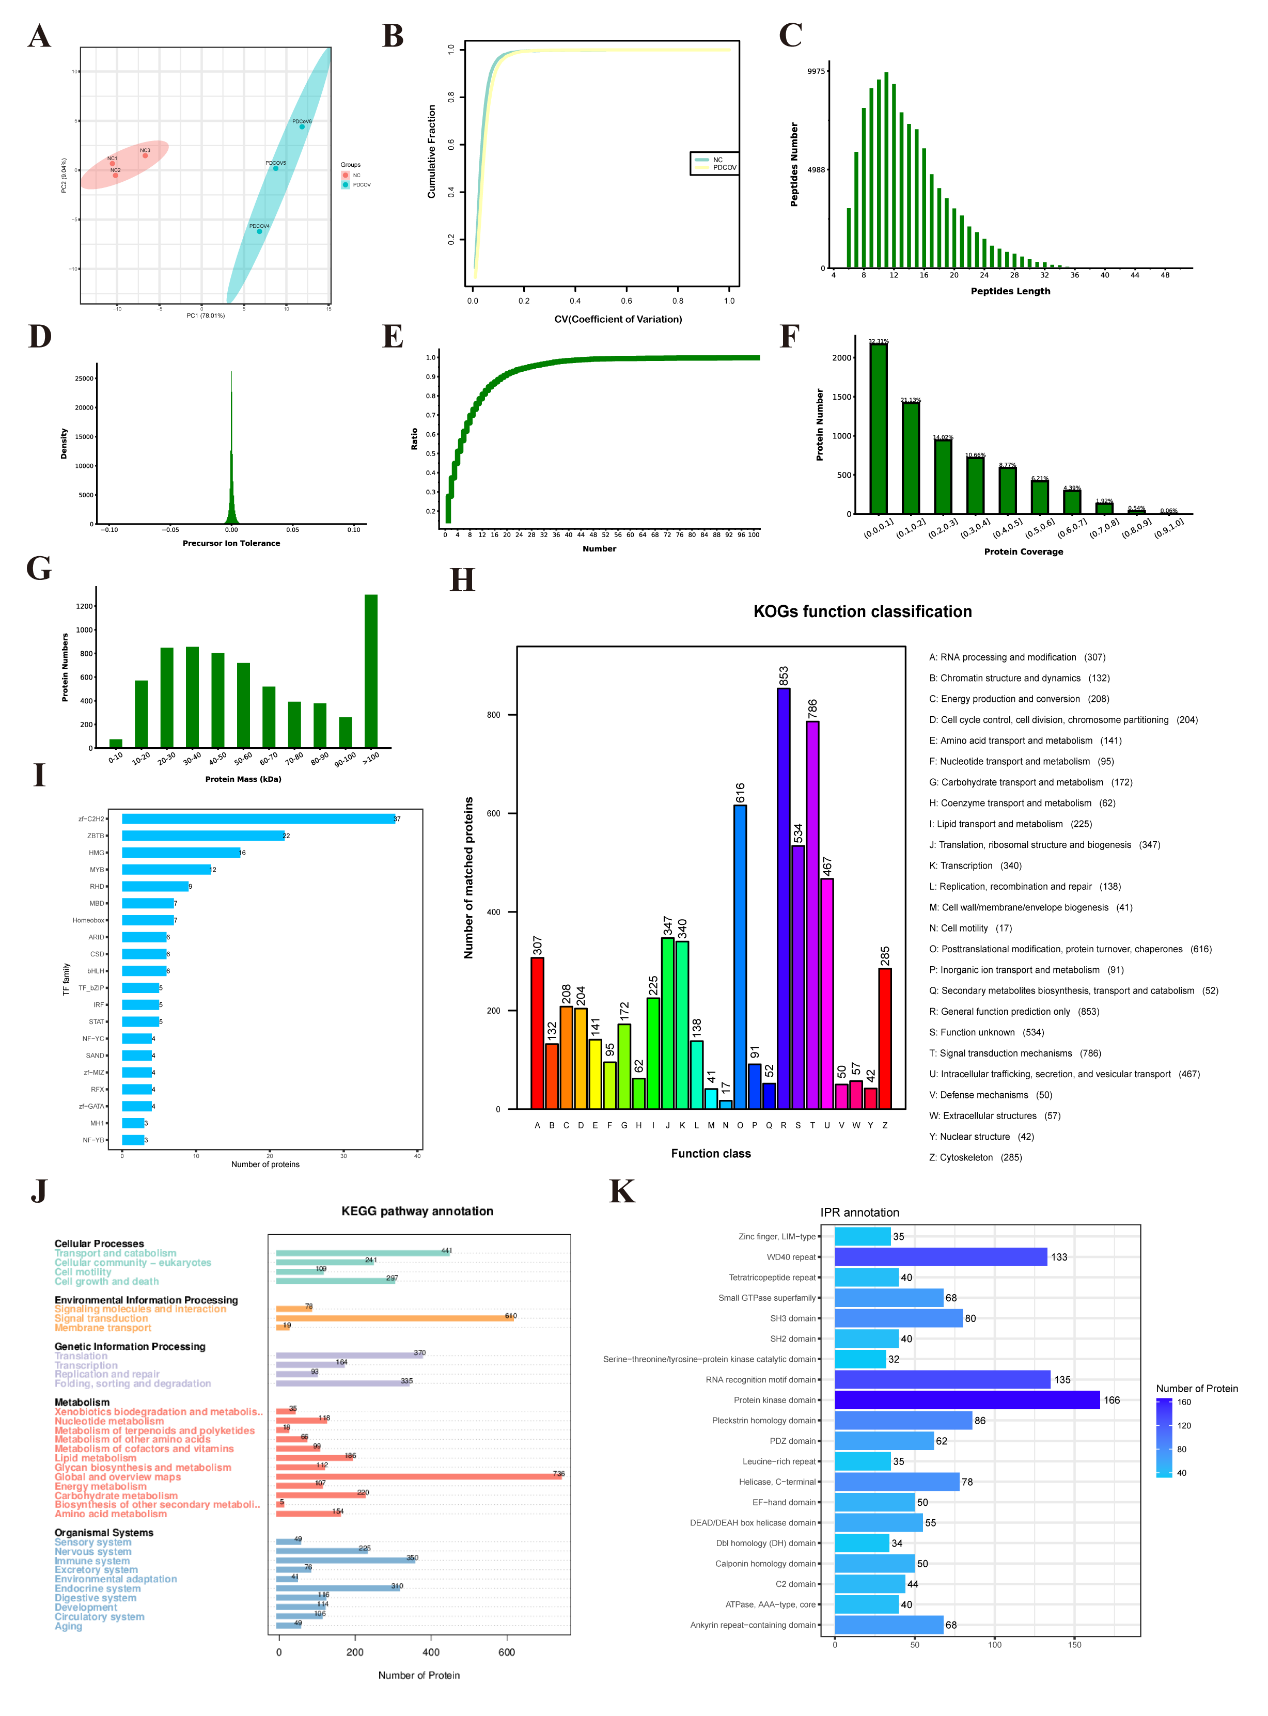


**Fig. S3 Proteomics quality evaluation of the identified proteins in PDCoV-infected LLC-PK1 cells at 18 h post-infection**

(A) PCA analysis based on the protein expression profile of each sample. (B) Repeatability CV analysis for all proteins in the corresponding samples. (C) Peptide length distributions of all identified proteins. (D) The near-zero distribution of mass error of all identified proteins. (E) Unique peptide segment distribution of all identified proteins. (F, G) The identified proteins coverage and molecular weight distribution. (H) Functional categories of the identified proteins were annotated by the COGs database. (I-K) TF, KEGG pathway, IPR annotations of the identified proteins.

**
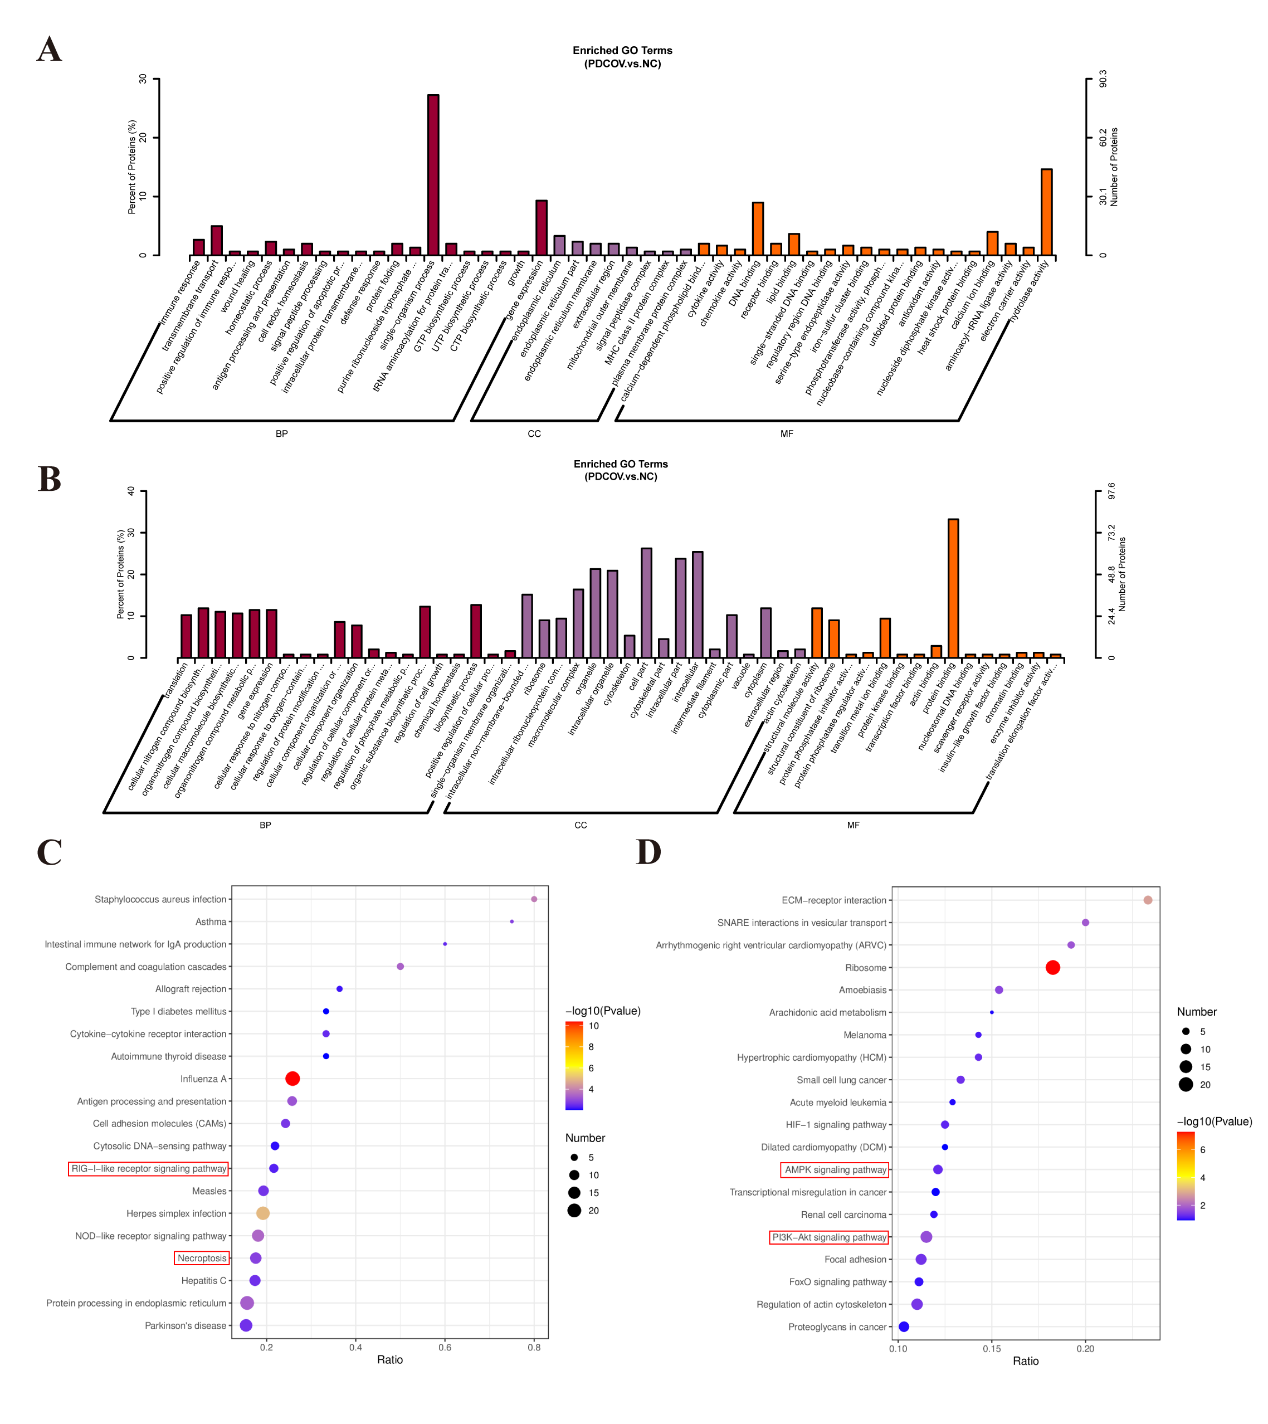
**

**Fig. S4 Proteomics enrichment analysis of DEPs in PDCoV-infected LLC-PK1 cells at 18 h post-infection**

(A, B) GO annotations of DEPs including biological processes (BP), cellular components (CC), and molecular functions (MF). Top 20 of enriched GO terms for up-regulated (A) and down-regulated DEPs (B) were showed. The x-axis represents the GO terms and the y-axis represents the number and percent of proteins. (C, D) Top 20 of enriched KEGG for up-regulated and down-regulated DEPs. The x-axis represents the GeneRatio and the y-axis was the KEGG description. The color of -log 10 (p value) coded from blue (low) to red (high). GeneNumber is the number of DEPs annotated to the KEGG pathway.

**Table S1 Sample sequencing data quality in PDCoV-infected LLC-PK1 cells**

| Sample | Raw Reads | Raw Bases | Clean Reads | Clean Bases | Q20 | Q30 | GC  Pct |
| --- | --- | --- | --- | --- | --- | --- | --- |
| NC1 | 43106964 | 6.47G | 41408792 | 6.21G | 98.10 | 94.64 | 49.81 |
| NC2 | 62324340 | 9.35G | 57330820 | 8.6G | 97.97 | 94.29 | 51.34 |
| NC3 | 55860204 | 8.38G | 53575754 | 8.04G | 97.95 | 94.30 | 51.40 |
| PDCoV1-1 | 43682852 | 6.55G | 42811160 | 6.42G | 97.93 | 94.23 | 51.47 |
| PDCoV1-2 | 50134992 | 7.52G | 48873148 | 7.33G | 98.02 | 94.45 | 51.40 |
| PDCoV1-3 | 43042630 | 6.46G | 41914392 | 6.29G | 98.03 | 94.47 | 52.07 |
| PDCoV2-1 | 80174200 | 12.03G | 78587752 | 11.79G | 98.63 | 96.01 | 49.34 |
| PDCoV2-2 | 125523786 | 18.83G | 123557262 | 18.53G | 98.59 | 95.91 | 48.84 |
| PDCoV2-3 | 126402764 | 18.96G | 123931108 | 18.59G | 98.66 | 96.14 | 49.00 |

Q20: The percentage of bases with a Phred value greater than 20 among the total bases

Q30: The percentage of bases with a Phred value greater than 30 among the total bases

GC pct: The percentages of G and C among the four bases in clean reads

PDCoV1: LLC-PK1 cells at 1.5 h post-PDCoV infection

PDCoV2: LLC-PK1 cells at 18 h post-PDCoV infection

**Table S2** **Top 10 of upregulated and downregulated DEGs following LLC-PK1 cells at 1.5 h post-PDCoV infection**

| Gene ID | log2Fold  Change | P value | Gene  name | Gene description |
| --- | --- | --- | --- | --- |
| 100515875 | 2.75 | 2.30E-111 | BATF2 | basic leucine zipper ATF-like transcription factor 2 |
| 396752 | 2.15 | 2.54E-169 | RSAD2 | radical S-adenosyl methionine domain containing 2 |
| 100622968 | 2.15 | 9.41E-153 | DUSP6 | dual specificity phosphatase 6 |
| 595128 | 1.98 | 4.30E-136 | OAS2 | 2'-5'-oligoadenylate synthetase 2 |
| 100523358 | 1.94 | 4.53E-101 | JUNB | JUNB proto-oncogene |
| 100520726 | 1.90 | 2.49E-147 | EGR1 | early growth response 1 |
| 100623872 | 1.51 | 2.52E-68 | CMPK2 | cytidine/uridine monophosphate kinase 2 |
| 100738544 | 1.46 | 3.00E-74 | ERRFI1 | ERBB receptor feedback inhibitor 1 |
| 396611 | 1.33 | 7.30E-67 | IRF1 | interferon regulatory factor 1 |
| 100514873 | 1.29 | 4.14E-66 | BHLHE40 | basic helix-loop-helix family member e40 |
| 100286778 | -1.83 | 2.72E-10 | PDK4 | pyruvate dehydrogenase kinase 4 |
| 100626099 | -0.81 | 1.77E-09 | TBL2 | transducin beta like 2 |
| 102163816 | -0.67 | 4.71E-09 | LOC102163816 | uncharacterized LOC102163816 |
| 100522864 | -0.64 | 5.88E-09 | RNPC3 | RNA binding region (RNP1%2C RRM) containing 3 |
| 100525703 | -0.57 | 1.97E-08 | DNAJB4 | DNAJ heat shock protein family (Hsp40) member B4 |
| 100513133 | -0.50 | 2.23E-08 | LOC100513133 | uncharacterized LOC100513133 |
| 100520233 | -0.47 | 2.63E-08 | ARRDC3 | arrestin domain containing 3 |
| 100155928 | -0.46 | 6.01E-07 | LRIG3 | leucine rich repeats and immunoglobulin like domains 3 |
| 100623242 | -0.41 | 1.03E-06 | FEM1C | fem-1 homolog C |
| 100521330 | -0.32 | 1.12E-06 | SKIDA1 | SKI/DACH domain containing 1 |

**Table S3 Top 10 of upregulated and downregulated DEGs following LLC-PK1 cells at 18 h post-PDCoV infection**

| Gene ID | log2Fold  Change | P value | Gene name | Gene description |
| --- | --- | --- | --- | --- |
| 494019 | 10.89 | 0 | CXCL10 | C-X-C motif chemokine ligand 10 |
| 100169744 | 10.57 | 0 | CXCL11 | C-X-C motif chemokine ligand 11 |
| 396668 | 8.68 | 0 | CCL4 | C-C motif chemokine ligand 4 |
| 110255360 | 8.18 | 0 | LOC110255360 | interferon-induced very large GTPase 1-like |
| 100155467 | 8.00 | 0 | IFIT2 | interferon induced protein with tetratricopeptide repeats 2 |
| 100154248 | 7.71 | 0 | IFIT3 | interferon induced protein with tetratricopeptide repeats 3 |
| 100155195 | 7.69 | 0 | LOC100155195 | guanylate-binding protein 7 |
| 595119 | 7.68 | 0 | OASL | 2'-5'-oligoadenylate synthetase like |
| 397623 | 7.57 | 0 | SIGLEC1 | sialic acid binding Ig like lectin 1 |
| 100154284 | 7.46 | 0 | PRDM1 | PR/SET domain 1%2C transcript variant X8 |

| 397520 | -4.30 | 1.54E-273 | ANPEP | alanyl aminopeptidase |
| --- | --- | --- | --- | --- |
| 102161049 | -3.72 | 1.04E-226 | FAT2 | FAT atypical cadherin 2 |
| 100124374 | -3.30 | 2.22E-305 | CYP26A1 | cytochrome P450%2C family 26 |
| 100519689 | -3.18 | 0 | LRP2 | LDL receptor related protein 2 |
| 100152510 | -3.13 | 7.84E-177 | CTHRC1 | collagen triple helix repeat containing 1 |
| 100151826 | -2.83 | 2.97E-229 | VAV3 | vav guanine nucleotide exchange factor 3 |
| 100515029 | -2.28 | 3.87E-215 | ADGRG1 | adhesion G protein-coupled receptor G1 |
| 100627510 | -1.99 | 4.35E-164 | CDH6 | cadherin 6 |
| 397403 | -1.99 | 3.67E-204 | GPX1 | glutathione peroxidase 1 |
| 100624725 | -1.56 | 3.34E-161 | NPNT | nephronectin |

**Table S4** **Top 50 of transcriptomics KEGG in LLC-PK1 cells at 18 post-PDCoV infection**

| KEGG  ID | Description | P value | Gene  Ratio | Gene Name  (partial) |
| --- | --- | --- | --- | --- |
| ssc04621 | NOD-like receptor signaling pathway | 1.19E-11 | 142/4696 | OAS2/STAT1/TXNIP/TNFAIP3/GBP1/BIRC3/STAT2/OAS1/IRF7/NFKB1 |
| ssc04620 | Toll-like receptor signaling pathway | 5.55E-08 | 86/4696 | CXCL10/STAT1/CXCL11/IRF7/NFKB1/CCL5/NFKBIA/CD40/IL6/CCL4 |
| ssc04068 | FoxO signaling pathway | 9.31E-08 | 104/4696 | GADD45A/TNFSF10/IL6/TGFB3/PIK3R1/BCL6/GADD45G/PLK3/IKBKB/STAT3 |
| ssc05165 | Human papillomavirus infection | 2.71E-07 | 234/4696 | ISG15/MX1/STAT1/IRF1/STAT2/TCIRG1/HES4/NFKB1/OASL/IFNAR2 |
| ssc04668 | TNF signaling pathway | 3.42E-07 | 89/4696 | CSF1/CXCL10/TNFAIP3/BIRC3/ICAM1/IRF1/JUNB/NFKB1/CCL5/NFKBIA |
| ssc04144 | Endocytosis | 5.65E-07 | 178/4696 | PML/SLA7/HSP70.2/EHD4/CHMP7/EHD3/LDLR/ARAP2/HSPA6/SLA-1 |
| ssc04010 | MAPK signaling pathway | 1.31E-06 | 195/4696 | CSF1/DUSP5/MYC/GADD45A/DUSP1/NFKB1/DUSP6/DUSP10/TGFB3/MAP3K8 |
| ssc05208 | Chemical carcinogenesis - reactive oxygen species | 2.39E-06 | 194/4696 | NFKB1/NFKBIA/ABL2/PIK3R1/FOS/JUN/MAP3K14/PTPN1/PRKD2/ABL1 |
| ssc05220 | Chronic myeloid leukemia | 2.59E-06 | 64/4696 | MYC/GADD45A/NFKB1/NFKBIA/TGFB3/PIK3R1/E2F2/GADD45G/STAT5A/ABL1 |
| ssc04919 | Thyroid hormone signaling pathway | 2.76E-06 | 94/4696 | STAT1/MYC/PIK3R1/RCAN1/MED13/BMP4/ATP1B1/PDPK1/PLCB3/DIO |
| ssc05161 | Hepatitis B | 5.49E-06 | 134/4696 | DDX58/STAT1/MYC/STAT2/IRF7/NFKB1/IFIH1/NFKBIA/CASP10/IL6 |
| ssc04622 | RIG-I-like receptor signaling pathway | 5.62E-06 | 62/4696 | DDX58/ISG15/CXCL10/ADAR/DHX58/IRF7/NFKB1/IFIH1/NFKBIA/CASP1 |
| ssc05418 | Fluid shear stress and atherosclerosis | 7.09E-06 | 115/4696 | ICAM1/DUSP1/NFKB1/EDN1/VCAM1/IL1A/SDC4/PIK3R1/ARHGEF2/FOS |
| ssc05203 | Viral carcinogenesis | 8.82E-06 | 145/4696 | IRF7/NFKB1/NFKBIA/PMAIP1/SLA7/EIF2AK2/PIK3R1/NFKB2/IRF9/ATF |
| ssc04210 | Apoptosis | 1.13E-05 | 115/4696 | MCL1/BIRC3/GADD45A/LOC100624226/NFKB1/NFKBIA/TNFSF10/CFLAR/CASP10/LOC100737977 |
| ssc05206 | MicroRNAs in cancer | 1.19E-05 | 123/4696 | MCL1/TIMP3/MYC/PLAU/DDIT4/NFKB1/RASSF1/PIK3R1/E2F2/SLC7A1 |
| ssc04936 | Alcoholic liver disease | 1.66E-05 | 102/4696 | NFKB1/NFKBIA/IL6/CXCL2/C2/TICAM1/MAP3K14/C3/RIPK1/C4A |
| ssc05169 | Epstein-Barr virus infection | 1.99E-05 | 168/4696 | OAS2/DDX58/ISG15/CXCL10/STAT1/TNFAIP3/TAP1/ICAM1/MYC/GADD45A |
| ssc05202 | Transcriptional misregulation in cancer | 2.15E-05 | 143/4696 | BIRC3/MYC/GADD45A/PLAU/PML/NFKB1/NUPR1/CD40/DUSP6/IL6 |
| ssc04630 | JAK-STAT signaling pathway | 2.80E-05 | 123/4696 | MCL1/STAT1/MYC/STAT2/IL6/JAK2/IFNAR2/PIK3R1/IRF9/LIF |
| ssc01212 | Fatty acid metabolism | 3.85E-05 | 47/4696 | CPT1A/ACADSB/ACSL3/HADHA/ACOX1/ACAT2/ACSL5/ACSBG1/OXSM/PPT2 |
| ssc04623 | Cytosolic DNA-sensing pathway | 4.62E-05 | 62/4696 | DDX58/CXCL10/ADAR/IRF7/NFKB1/CCL5/NFKBIA/ZBP1/IL6/CCL4 |
| ssc04722 | Neurotrophin signaling pathway | 4.76E-05 | 95/4696 | NFKB1/NFKBIA/NFKBIE/IRAK2/PIK3R1/ATF4/JUN/RIPK2/ABL1/MAP3K5 |
| ssc05167 | Kaposi sarcoma-associated herpesvirus infection | 4.77E-05 | 155/4696 | STAT1/ICAM1/MYC/STAT2/IRF7/NFKB1/NFKBIA/ZFP36/IL6/CXCL2 |
| ssc05132 | Salmonella infection | 5.78E-05 | 187/4696 | BIRC3/MYC/LOC100624226/NFKB1/NFKBIA/TNFSF10/LOC100522887/IL6/LOC100737977/NLRP3 |
| ssc05417 | Lipid and atherosclerosis | 9.26E-05 | 164/4696 | HSPA5/ICAM1/LOC100624226/IRF7/NFKB1/CCL5/NFKBIA/TNFSF10/XBP1/CD40 |
| ssc05219 | Bladder cancer | 0.000105 | 34/4696 | MYC/RASSF1/E2F2/HBEGF/VEGFA/CDH1/CXCL8/CDKN1A/ERBB2/MDM2 |
| ssc05160 | Hepatitis C | 0.000105 | 124/4696 | RSAD2/OAS2/DDX58/CXCL10/MX1/STAT1/MYC/STAT2/OAS1/IRF7 |
| ssc04142 | Lysosome | 0.000107 | 97/4696 | TCIRG1/GM2A/CTSS/NCOA7/AP1S3/ENTPD4/LITAF/M6PR/SCARB2/IDS |
| ssc05164 | Influenza A | 0.000124 | 131/4696 | RSAD2/OAS2/DDX58/CXCL10/MX1/STAT1/ADAR/ICAM1/LOC100624226/STAT2 |
| ssc04110 | Cell cycle | 0.000161 | 116/4696 | MYC/GADD45A/TGFB3/E2F2/ORC2/GADD45G/CDC25B/CDKN2C/ABL1/CDC25A |
| ssc04072 | Phospholipase D signaling pathway | 0.000162 | 105/4696 | PLPP3/GNA13/PIK3R1/PTK2B/RALGDS/RRAS2/ADCY4/PLCB3/CYTH1/CXCL8 |
| ssc05133 | Pertussis | 0.00018 | 58/4696 | IRF1/NFKB1/IL6/C1R/C1S/SERPING1/IL1A/C2/NLRP3/FOS |
| ssc05163 | Human cytomegalovirus infection | 0.000227 | 167/4696 | TAP1/MYC/NFKB1/CCL5/NFKBIA/IL6/CCL4/SLA-7/BID/GNA13 |
| ssc04625 | C-type lectin receptor signaling pathway | 0.000242 | 76/4696 | STAT1/IRF1/STAT2/NFKB1/NFKBIA/IL6/PIK3R1/NFKB2/IRF9/NLRP3 |
| ssc04071 | Sphingolipid signaling pathway | 0.000292 | 90/4696 | NFKB1/SGPP2/SGMS2/BID/GNA13/PIK3R1/MAP3K5/TNF/TRAF2/PDPK1 |
| ssc05152 | Tuberculosis | 0.000342 | 134/4696 | STAT1/TCIRG1/NFKB1/CASP10/IL6/JAK2/CD74/TGFB3/IL1A/IRAK2 |
| ssc05010 | Alzheimer disease | 0.000382 | 289/4696 | CSF1/NFKB1/XBP1/IL6/DDIT3/IL1A/EIF2AK2/BID/PIK3R1/ATF4 |
| ssc05166 | Human T-cell leukemia virus 1 infection | 0.000633 | 166/4696 | EGR1/ICAM1/MYC/NFKB1/NFKBIA/CD40/ZFP36/IL6/FOSL1/TGFB3 |
| ssc05212 | Pancreatic cancer | 0.000691 | 59/4696 | STAT1/GADD45A/NFKB1/TGFB3/PIK3R1/E2F2/RALGDS/GADD45G/VEGFA/IKBKB |
| ssc04145 | Phagosome | 0.000816 | 109/4696 | TAP1/TCIRG1/C1R/SLA-7/SLADRA/CTSS/OLR1/TAP2/C3/SLA-1 |
| ssc05205 | Proteoglycans in cancer | 0.000817 | 143/4696 | TIMP3/MYC/PLAU/SDC4/PIK3R1/VAV3/RRAS2/FLNC/PLAUR/HBEGF |
| ssc04218 | Cellular senescence | 0.000909 | 116/4696 | MYC/ZFP36L1/GADD45A/NFKB1/IL6/TGFB3/IL1A/SLA-7/PIK3R1/E2F2 |
| ssc04141 | Protein processing in endoplasmic reticulum | 0.001009 | 117/4696 | HSPA5/HERPUD1/XBP1/DDIT3/HSP70.2/EIF2AK2/ATF4/PPP1R15A/DNAJB1/YOD1 |
| ssc05168 | Herpes simplex virus 1 infection | 0.00107 | 252/4696 | OAS2/DDX58/STAT1/TAP1/BIRC3/STAT2/OAS1/PML/IRF7/NFKB1 |
| ssc00280 | Valine, leucine and isoleucine degradation | 0.001105 | 40/4696 | IL4I1/AACS/ACADSB/BCAT1/ALDH2/HADHA/ACAT2/ALDH3A2/DLD/MUT |
| ssc01200 | Carbon metabolism | 0.001105 | 94/4696 | HK2/CAT/PDHB/PHGDH/PSAT1/ACOX1/IDH1/ACAT2/GPT2/ME1 |
| ssc04140 | Autophagy - animal | 0.001133 | 103/4696 | DDIT4/CFLAR/PIK3R1/ERN1/RRAS2/PDPK1/PRKCD/ATG9A/IGF1R/RUBCN |
| ssc04933 | AGE-RAGE signaling pathway in diabetic complications | 0.001145 | 72/4696 | EGR1/STAT1/ICAM1/NFKB1/IL6/JAK2/EDN1/TGFB3/VCAM1/IL1A |
| ssc05216 | Thyroid cancer | 0.001335 | 30/4696 | MYC/GADD45A/GADD45G/CDH1/CCDC6/BAK1/CDKN1A/TCF7L2/LEF1/DDB2 |

**Table S5 Top 5 of different genes in four subclusters on LLC-PK1 cells**

| Gene_  id | NC1 | NC2 | NC3 | PDCoV1-1 | PDCoV1-2 | PDCoV1-3 | PDCoV2-1 | PDCoV2-2 | PDCoV2-3 | Gene_  name | Gene description |
| --- | --- | --- | --- | --- | --- | --- | --- | --- | --- | --- | --- |
| Cluster1 |  |  |  |  |  |  |  |  |  |  |  |
| 397422 | -2.50 | -3.61 | -3.20 | -2.03 | -2.25 | -2.31 | 5.23 | 5.28 | 5.39 | CCL2 | chemokine (C-C motif) ligand 2 |
| 396668 | -3.50 | -2.80 | -2.96 | -2.12 | -2.23 | -1.94 | 5.23 | 5.17 | 5.15 | CCL4 | C-C motif chemokine ligand 4 |
| 100310806 | -2.58 | -2.58 | -2.58 | -2.58 | -2.58 | -2.58 | 5.11 | 5.27 | 5.07 | IFN-ALPHAOMEGA | interferon-alphaomega |
| 100155467 | -2.75 | -2.90 | -3.03 | -2.06 | -1.99 | -1.89 | 4.80 | 4.88 | 4.93 | IFIT2 | interferon induced protein with tetratricopeptide repeats 2 |
| 100217388 | -2.53 | -2.68 | -2.46 | -2.18 | -2.32 | -2.41 | 4.90 | 4.77 | 4.90 | IL29 | interleukin 29 |
| Cluster2 |  |  |  |  |  |  |  |  |  |  |  |
| 100155760 | -1.34 | -1.36 | -1.10 | -1.50 | -1.52 | -1.05 | 2.37 | 2.60 | 2.90 | LOC100155760 | interferon omega 1 |
| 100522257 | -1.44 | -1.36 | -1.21 | -1.32 | -1.37 | -1.34 | 2.71 | 2.52 | 2.80 | IL4I1 | interleukin 4 induced 1 |
| 100523310 | -1.43 | -1.27 | -1.44 | -1.45 | -1.13 | -1.39 | 2.68 | 2.68 | 2.76 | LOC100523310 | guanylate-binding protein 6 |
| 106504234 | -1.00 | -1.49 | -1.24 | -1.03 | -1.37 | -1.43 | 2.46 | 2.38 | 2.72 | LOC106504234 | putative olfactory receptor 2I1 |
| 100271930 | -1.28 | -1.26 | -1.17 | -1.33 | -1.33 | -1.33 | 2.51 | 2.54 | 2.65 | IL7R | interleukin 7 receptor |
| Cluster3 |  |  |  |  |  |  |  |  |  |  |  |
| 397520 | 1.16 | 1.15 | 1.24 | 1.18 | 1.09 | 1.13 | -2.36 | -2.25 | -2.34 | ANPEP | alanyl aminopeptidase |
| 100152510 | 1.14 | 0.97 | 1.00 | 0.86 | 0.93 | 0.89 | -1.89 | -1.81 | -2.08 | CTHRC1 | collagen triple helix repeat containing 1 |
| 397134 | 0.95 | 1.00 | 1.02 | 1.06 | 1.07 | 0.91 | -2.07 | -2.03 | -1.93 | DAO | D-amino acid oxidase |
| 100516512 | 1.19 | 1.10 | 1.13 | 0.80 | 0.85 | 0.80 | -2.10 | -1.86 | -1.92 | FAM107A | family with sequence similarity 107 member A |
| 100124374 | 0.97 | 1.06 | 1.02 | 1.00 | 0.90 | 1.04 | -2.00 | -2.08 | -1.90 | CYP26A1 | cytochrome P450%2C family 26 |
| Cluster4 |  |  |  |  |  |  |  |  |  |  |  |
| 494019 | -3.34 | -3.49 | -3.58 | -3.19 | -2.94 | -3.40 | 6.55 | 6.66 | 6.73 | CXCL10 | C-X-C motif chemokine ligand 10 |
| 100169744 | -3.16 | -3.23 | -3.45 | -2.66 | -3.22 | -3.14 | 6.15 | 6.33 | 6.39 | CXCL11 | C-X-C motif chemokine ligand 11 |
| 445459 | -2.97 | -2.91 | -2.63 | -3.13 | -3.13 | -3.13 | 5.93 | 6.02 | 5.94 | IFNB1 | interferon beta 1 |
| 110255217 | -2.84 | -2.84 | -2.84 | -2.84 | -2.84 | -2.73 | 5.68 | 5.60 | 5.65 | LOC110255217 | interferon lambda-3-like |

**Table S6 Top 20 of DEPs in LLC-PK1 cells at 18 post-PDCoV infection**

| Protein ID | Gene | P value | log2FC | Up or Down | Description |
| --- | --- | --- | --- | --- | --- |
| XP_020953252.1 | LOC102165849 | 0.026298 | 2.226337 | up | uncharacterized protein C1orf167, partial [Sus scrofa] |
| XP_005671321.1 | IFIT2 | 4.93E-06 | 2.190216 | up | interferon-induced protein with tetratricopeptide repeats 2 isoform X1 [Sus scrofa] |
| XP_020921771.1 | ZCCHC7 | 5.07E-05 | 2.124768 | up | zinc finger CCHC domain-containing protein 7 [Sus scrofa] |
| NP_001008691.1 | CXCL10 | 0.001865 | 2.075217 | up | C-X-C motif chemokine 10 precursor [Sus scrofa] |
| NP_001020387.1 | LOC574051 | 0.002171 | 1.812561 | up | histone H1.2 [Sus scrofa] |
| XP_003356892.1 | LOC100621287 | 0.012519 | 1.731126 | up | MORF4 family-associated protein 1 [Sus scrofa] |
| NP_001090885.1 | MX2 | 0.009333 | 1.730796 | up | interferon-induced GTP-binding protein Mx2 [Sus scrofa] |
| XP_003131510.1 | KRT20 | 0.015711 | -1.72269 | down | keratin, type I cytoskeletal 20 [Sus scrofa] |
| XP_020945969.1 | LOC100155195 | 1.95E-07 | 1.526274 | up | guanylate-binding protein 7 [Sus scrofa] |
| XP_020929339.1 | OAS1 | 4.26E-06 | 1.448184 | up | LOW QUALITY PROTEIN: 2-5-oligoadenylate synthase 1 [Sus scrofa] |
| NP_001231292.1 | IFIT1 | 0.001463 | 1.446349 | up | interferon-induced protein with tetratricopeptide repeats 1 [Sus scrofa] |
| NP_998982.1 | RSAD2 | 1.87E-05 | 1.439903 | up | radical S-adenosyl methionine domain-containing protein 2 [Sus scrofa] |
| XP_020953489.1 | LOC110255217 | 1.55E-05 | 1.431232 | up | interferon lambda-3-like [Sus scrofa] |
| NP_001191324.1 | IFIT3 | 5.95E-05 | 1.41343 | up | interferon-induced protein with tetratricopeptide repeats 3 [Sus scrofa] |
| XP_020935903.1 | IRF1 | 9.26E-05 | 1.374205 | up | interferon regulatory factor 1 isoform X1 [Sus scrofa] |
| NP_999008.2 | SOX9 | 1.08E-05 | 1.345413 | up | transcription factor SOX-9 [Sus scrofa] |
| XP_020945588.1 | LOC100738744 | 0.000372 | -1.30563 | down | histone H2B type 2-E [Sus scrofa] |
| NP_999226.2 | MX1 | 0.006316 | 1.297035 | up | interferon-induced GTP-binding protein Mx1 [Sus scrofa] |
| XP_005661188.2 | SBF2 | 0.032669 | 1.283191 | up | myotubularin-related protein 13 isoform X1 [Sus scrofa] |
| XP_020944163.1 | GBP1 | 2.69E-05 | 1.259154 | up | interferon-induced guanylate-binding protein 1 isoform X1 [Sus scrofa] |
